# Supplementary material
Source: PubMed Central journal article supplement (PMC5827604)
Supplement: ASN.2017080849SupplementaryData1.pdf [file ASN.2017080849SupplementaryData1.pdf]

**Supplementary Table 1. Comparison of baseline characteristics between patients with and without serum magnesium data**

|                                    | Patients with Mg data<br>n = 113,683 | Patients without Mg data<br>n = 53,618 | Standardized mean difference |
|------------------------------------|--------------------------------------|----------------------------------------|------------------------------|
| <b><i>Demographics</i></b>         |                                      |                                        |                              |
| Age, year                          | 64.9 (12.3)                          | 65.1 (12.4)                            | 0.02                         |
| Female, %                          | 37.5                                 | 37.4                                   | 0.003                        |
| Body mass index, kg/m <sup>2</sup> | 22.4 (4.2)                           | 22.4 (3.7)                             | 0.008                        |
| Poor physical activity, %          | 8.2                                  | 8.8                                    | 0.02                         |
| Diabetes mellitus, %               | 34.8                                 | 34.9                                   | 0.002                        |
| Dialysis vintage, year             | 6 [3, 11]                            | 6 [3, 11]                              | 0.07                         |
| Duration of dialysis, hrs per week | 11.7 (1.8)                           | 11.6 (1.8)                             | 0.05                         |
| Urea reduction rate, %             | 67.9 (9.9)                           | 66.9 (13.1)                            | 0.09                         |
| <b><i>Laboratory Data</i></b>      |                                      |                                        |                              |
| Albumin, g/dL                      | 3.7 (0.4)                            | 3.7 (0.4)                              | 0.03                         |
| Calcium, mg/dL                     | 9.3 (0.9)                            | 9.3 (0.9)                              | 0.05                         |
| Phosphate, mg/dL                   | 5.1 (1.4)                            | 5.1 (1.5)                              | <0.001                       |
| C-reactive protein, mg/dL          | 0.1 [0, 0.3]                         | 0.1 [0, 0.3]                           | 0.03                         |
| Hemoglobin, g/dL                   | 10.6 (1.2)                           | 10.5 (1.3)                             | 0.08                         |
| Alkaline phosphatase, IU/L         | 258 (133)                            | 260 (135)                              | 0.008                        |
| intact PTH, pg/mL                  | 126 [65, 210]                        | 130 [67, 214]                          | 0.03                         |
| <b><i>Past history</i></b>         |                                      |                                        |                              |

|                            |      |      |       |
|----------------------------|------|------|-------|
| Myocardial infarction, %   | 6.5  | 6.7  | 0.006 |
| Cerebral infarction, %     | 11.1 | 11.2 | 0.003 |
| Cerebral hemorrhage, %     | 4.1  | 4.0  | 0.006 |
| Amputation, %              | 2.4  | 2.3  | 0.003 |
| Parathyroidectomy, %       | 5.9  | 4.9  | 0.04  |
| <b><i>Medication</i></b>   |      |      |       |
| CaCO <sub>3</sub> , %      | 62.0 | 59.5 | 0.05  |
| Sevelamer hydrochloride, % | 29.5 | 27.4 | 0.05  |
| Lanthanum carbonate, %     | 13.8 | 14.0 | 0.007 |
| Vit.D (i.v.), %            | 27.3 | 24.6 | 0.06  |
| Vit.D (p.o.), %            | 39.0 | 38.2 | 0.02  |
| Cinacalcet, %              | 12.2 | 10.9 | 0.04  |

---

Data presented as mean (standard deviation), or median [interquartile range], or percent.

Abbreviations: PTH, parathyroid hormone; Vit.D, active vitamin D analog

**Supplementary Table 2. Baseline characteristics according to quartiles of serum magnesium levels weighted by inverse probability weighting**

|                                    | Quartiles of serum magnesium levels       |              |              |              |
|------------------------------------|-------------------------------------------|--------------|--------------|--------------|
|                                    | (Range of serum magnesium levels [mg/dL]) |              |              |              |
|                                    | Q1                                        | Q2           | Q3           | Q4           |
|                                    | (- 2.3)                                   | (2.4 - 2.6)  | (2.7 - 2.8)  | (2.9 -)      |
| <b><i>Demographics</i></b>         |                                           |              |              |              |
| Age, year                          | 66.2 (12.2)                               | 65.5 (12.5)  | 65.0 (12.3)  | 64.9 (12.2)  |
| Female, %                          | 37.8                                      | 38.0         | 38.3         | 39.1         |
| Body mass index, kg/m <sup>2</sup> | 22.4 (3.9)                                | 22.3 (4.4)   | 22.3 (3.6)   | 22.3 (3.6)   |
| Poor physical activity, %          | 10.5                                      | 10.3         | 8.2          | 9.5          |
| Diabetes mellitus, %               | 35.6                                      | 35.3         | 35.2         | 35.1         |
| Dialysis vintage, year             | 6 [3, 11]                                 | 6 [3, 11]    | 6 [3, 11]    | 7 [3, 11]    |
| Dialysis time, hrs per week        | 11.7 (1.9)                                | 11.7 (1.8)   | 11.8 (1.6)   | 11.8 (1.6)   |
| Urea reduction rate, %             | 68.0 (8.4)                                | 68.0 (10.7)  | 68.4 (9.2)   | 68.5 (9.8)   |
| <b><i>Laboratory Data</i></b>      |                                           |              |              |              |
| Albumin, g/dL                      | 3.7 (0.4)                                 | 3.7 (0.4)    | 3.7 (0.4)    | 3.7 (0.4)    |
| Albumin-adjusted calcium, mg/dL    | 9.3 (0.9)                                 | 9.3 (0.9)    | 9.3 (0.9)    | 9.3 (0.9)    |
| Phosphate, mg/dL                   | 5.0 (1.4)                                 | 5.1 (1.4)    | 5.2 (1.4)    | 5.2 (1.4)    |
| C-reactive protein, mg/dL          | 0.1 [0, 0.4]                              | 0.1 [0, 0.3] | 0.1 [0, 0.3] | 0.1 [0, 0.3] |
| Hemoglobin, g/dL                   | 10.6 (1.2)                                | 10.6 (1.2)   | 10.7 (1.2)   | 10.7 (1.2)   |

|                             |               |               |               |               |
|-----------------------------|---------------|---------------|---------------|---------------|
| Alkaline phosphatase, IU/L  | 265 (137)     | 263 (146)     | 258 (130)     | 260 (135)     |
| intact PTH, pg/mL           | 125 [65, 208] | 125 [65, 207] | 126 [66, 209] | 123 [63, 205] |
| <b><i>Past history</i></b>  |               |               |               |               |
| Myocardial infarction, %    | 7.6           | 7.4           | 7.0           | 6.8           |
| Cerebral infarction, %      | 12.7          | 12.3          | 11.6          | 11.8          |
| Cerebral hemorrhage, %      | 4.6           | 4.4           | 4.3           | 4.6           |
| Limb amputation, %          | 2.7           | 2.6           | 2.5           | 2.6           |
| Parathyroidectomy, %        | 6.0           | 6.0           | 6.1           | 6.2           |
| <b><i>Medication</i></b>    |               |               |               |               |
| CaCO <sub>3</sub> , %       | 61.1          | 61.4          | 63.6          | 63.1          |
| Sevelamer hydrochloride, %  | 27.2          | 29.3          | 30.7          | 31.0          |
| Lanthanum carbonate, %      | 13.4          | 13.8          | 14.6          | 14.8          |
| Vit.D (i.v.), %             | 27.4          | 27.7          | 28.3          | 28.4          |
| Vit.D (p.o.), %             | 40.1          | 39.2          | 39.4          | 38.5          |
| Cinacalcet hydrochloride, % | 12.3          | 12.4          | 12.9          | 13.1          |

---

Abbreviations: PTH, parathyroid hormone; Vit.D, active vitamin D analogue.
